# Supplementary material
Source: Springer Nature journal article supplement (https://www.springermedizin.de/resource/supplementary/12890_2010_269_MOESM16_ESM.pdf/9504838)

REF SEX

Relative Risk  
95% CIWeight  
(%)Relative Risk  
95% CI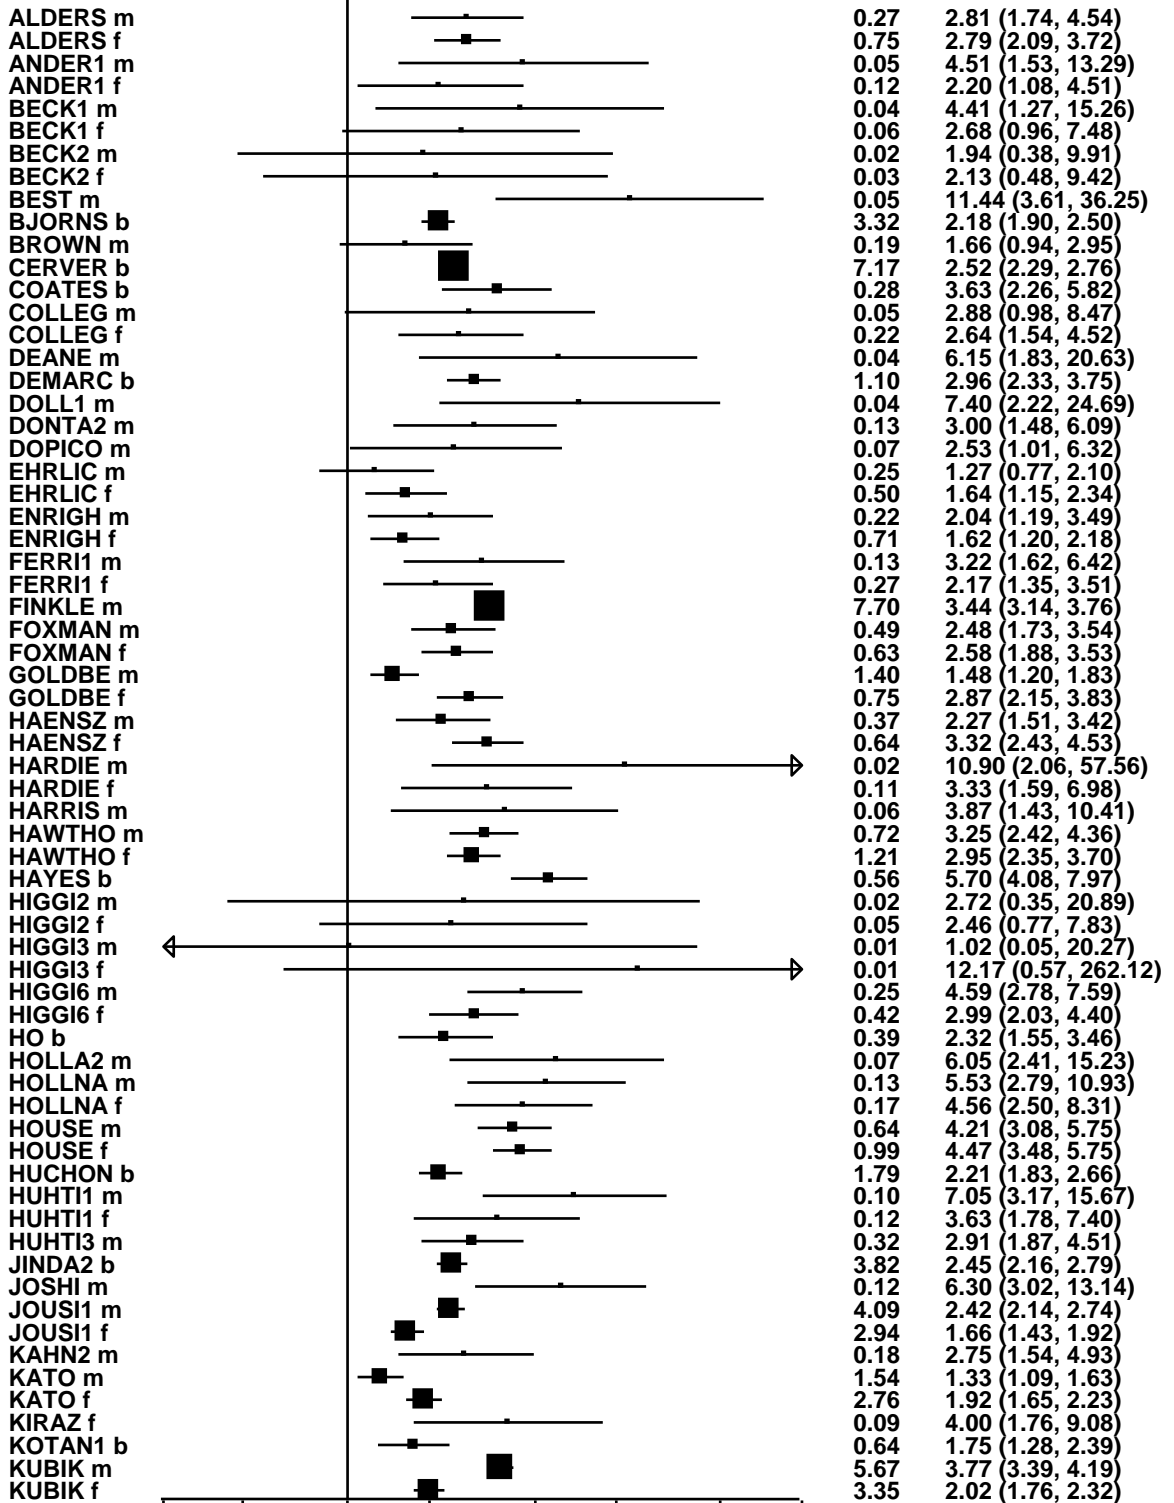

0.20 0.40 1 2 5 10 25 50

Supplement: MOESM16 [file 9504838]
